# Supplementary material for: Air Pollution and Pulmonary Tuberculosis: A Nested Case–Control Study among Members of a Northern California Health Plan
Source: PubMed Central journal article supplement (PMC4892908; doi:10.1289/ehp.1408166), 2016-02-09

**Note to readers with disabilities:** *EHP* strives to ensure that all journal content is accessible to all readers. However, some figures and Supplemental Material published in *EHP* articles may not conform to [508 standards](#) due to the complexity of the information being presented. If you need assistance accessing journal content, please contact [ehp508@niehs.nih.gov](mailto:ehp508@niehs.nih.gov). Our staff will work with you to assess and meet your accessibility needs within 3 working days.

## **Supplemental Material**

### **Air Pollution and Pulmonary Tuberculosis: A Nested Case-Control Study among Members of a Northern California Health Plan**

Geneé S. Smith, Stephen K. Van Den Eeden, Cynthia Garcia, Jun Shan, Roger Baxter, Amy H. Herring, David B. Richardson, Annelies Van Rie, Michael Emch, and Marilie D. Gammon

#### **Table of Contents**

**Table S1.** Multi-pollutant conditional logistic regression estimated adjusted odds ratios (ORs) and 95% confidence intervals (CIs) for associations of pulmonary tuberculosis and ambient criteria air pollutants concentrations, 24-month averages, among cases and matched controls nested within the 1996-2010 KPNC membership, stratified by smoking status.

**Figure S1.** Available PM<sub>2.5</sub> pollutant monitors in California

**Figure S2.** Available PM<sub>10</sub> pollutant monitors in California

**Figure S3.** Available SO<sub>2</sub> pollutant monitors in California

**Figure S4.** Available NO<sub>2</sub> pollutant monitors in California

**Figure S5.** Available O<sub>3</sub> pollutant monitors in California

**Figure S6.** Available CO pollutant monitors in California

Table S1. Multi-pollutant<sup>a</sup> conditional logistic regression estimated adjusted<sup>b</sup> odds ratios (ORs) and 95% confidence intervals (CIs) for associations of pulmonary tuberculosis and ambient criteria air pollutants concentrations, 24-month averages, among cases and matched controls nested within the 1996-2010 KPNC membership, stratified by smoking status.

| <b>Pollutant</b>        | <b>Quintile</b> | <b>Never Smokers</b> | <b>Ever Smokers</b> |
|-------------------------|-----------------|----------------------|---------------------|
| <b>PM<sub>2.5</sub></b> | 1               | ref                  | ref                 |
|                         | 2               | 1.17 (0.94, 1.46)    | 1.72 (0.84, 3.53)   |
|                         | 3               | 1.09 (0.84, 1.42)    | 1.37 (0.65, 2.89)   |
|                         | 4               | 1.17 (0.85, 1.62)    | 1.83 (0.73, 4.59)   |
|                         | 5               | 0.99 (0.80, 1.23)    | 1.35 (0.48, 3.78)   |
| <b>PM<sub>10</sub></b>  | 1               | ref                  | ref                 |
|                         | 2               | 0.79 (0.62, 1.01)    | 0.91 (0.52, 1.59)   |
|                         | 3               | 1.01 (0.78, 1.31)    | 1.16 (0.58, 2.32)   |
|                         | 4               | 0.84 (0.63, 1.12)    | 0.86 (0.37, 1.99)   |
|                         | 5               | 0.71 (0.50, 1.01)    | 1.10 (0.45, 2.69)   |
| <b>SO<sub>2</sub></b>   | 1               | ref                  | ref                 |
|                         | 2               | 0.93 (0.74, 1.17)    | 1.13 (0.73, 1.75)   |
|                         | 3               | 0.76 (0.60, 0.96)    | 1.10 (0.68, 1.78)   |
|                         | 4               | 1.10 (0.83, 1.47)    | 1.10 (0.67, 1.81)   |
|                         | 5               | 0.78 (0.62, 0.97)    | 0.97 (0.51, 1.81)   |
| <b>NO<sub>2</sub></b>   | 1               | ref                  | ref                 |
|                         | 2               | 1.04 (0.80, 1.35)    | 1.19 (0.57, 2.48)   |
|                         | 3               | 1.07 (0.81, 1.41)    | 1.35 (0.61, 2.99)   |
|                         | 4               | 1.08 (0.80, 1.46)    | 1.57 (0.62, 3.99)   |
|                         | 5               | 1.27 (0.84, 1.92)    | 1.75 (0.82, 3.72)   |
| <b>O<sub>3</sub></b>    | 1               | ref                  | ref                 |
|                         | 2               | 0.96 (0.57, 1.62)    | 0.95 (0.52, 1.73)   |
|                         | 3               | 0.76 (0.42, 1.40)    | 0.98 (0.52, 1.85)   |
|                         | 4               | 0.78 (0.41, 1.45)    | 0.68 (0.35, 1.31)   |
|                         | 5               | 0.76 (0.39, 1.49)    | 0.97 (0.42, 2.20)   |
| <b>CO</b>               | 1               | ref                  | ref                 |
|                         | 2               | 1.15 (0.97, 1.36)    | 1.04 (0.53, 2.04)   |
|                         | 3               | 1.33 (1.02, 1.73)    | 1.16 (0.68, 1.99)   |
|                         | 4               | 1.57 (1.12, 2.20)    | 1.35 (0.57, 3.20)   |
|                         | 5               | 1.55 (1.23, 1.95)    | 1.29 (0.56, 2.97)   |

<sup>a</sup> Multi-Pollutant Model: SO<sub>2</sub>+PM<sub>10</sub>+PM<sub>2.5</sub>+CO+NO<sub>2</sub>+ O<sub>3</sub>

<sup>b</sup> Adjusted for the matching factors (age, gender, and race/ethnicity).

Figure S1. Available PM<sub>2.5</sub> pollutant monitors in California

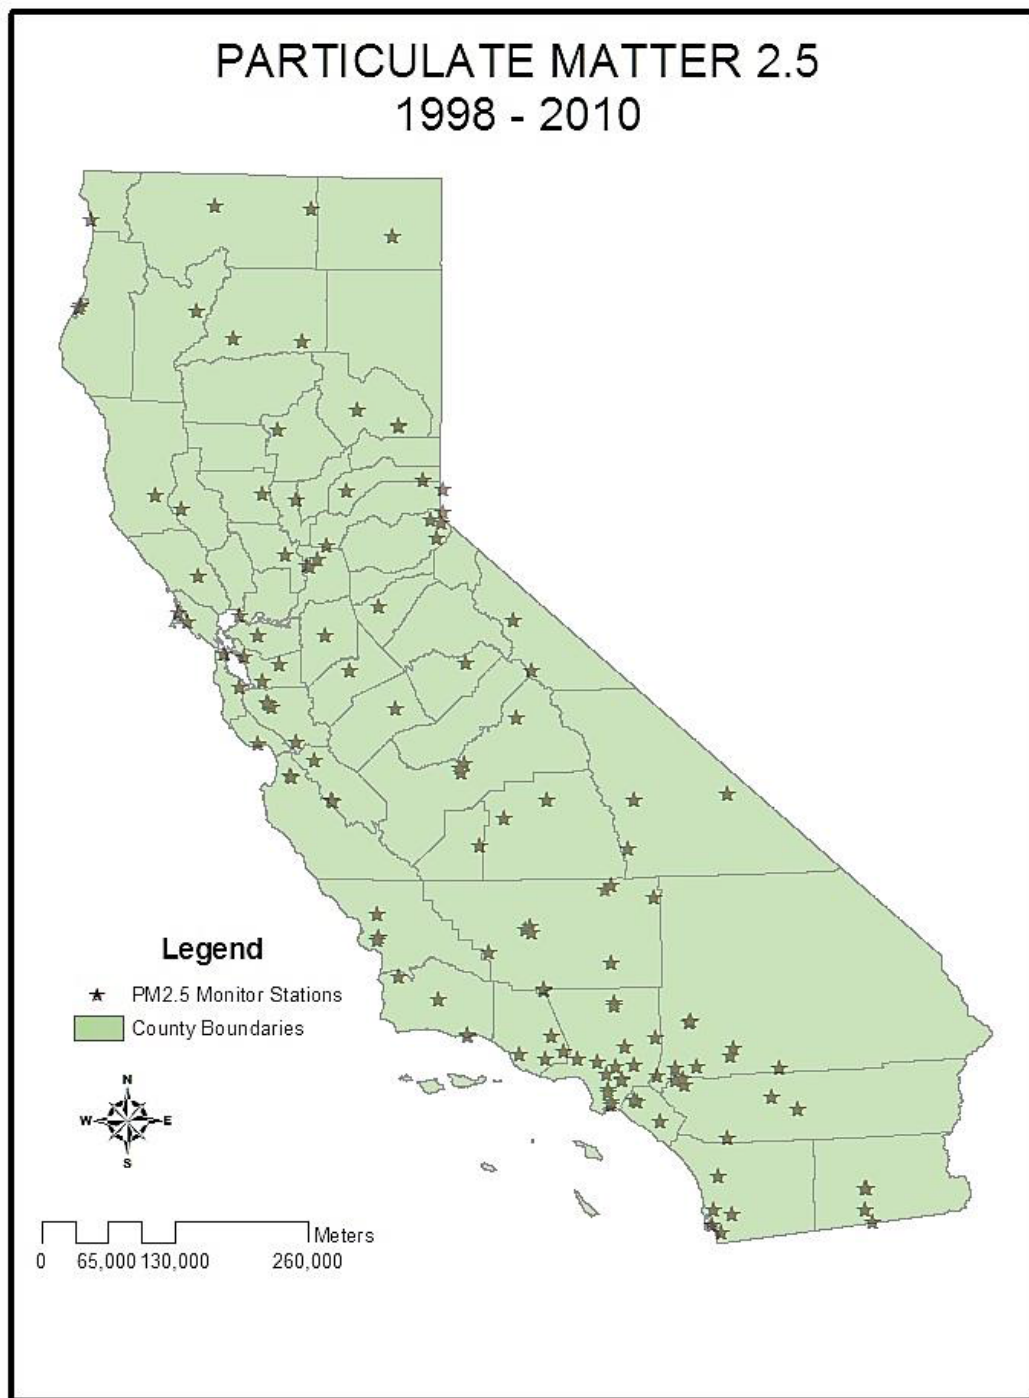

Figure S2. Available PM<sub>10</sub> pollutant monitors in California

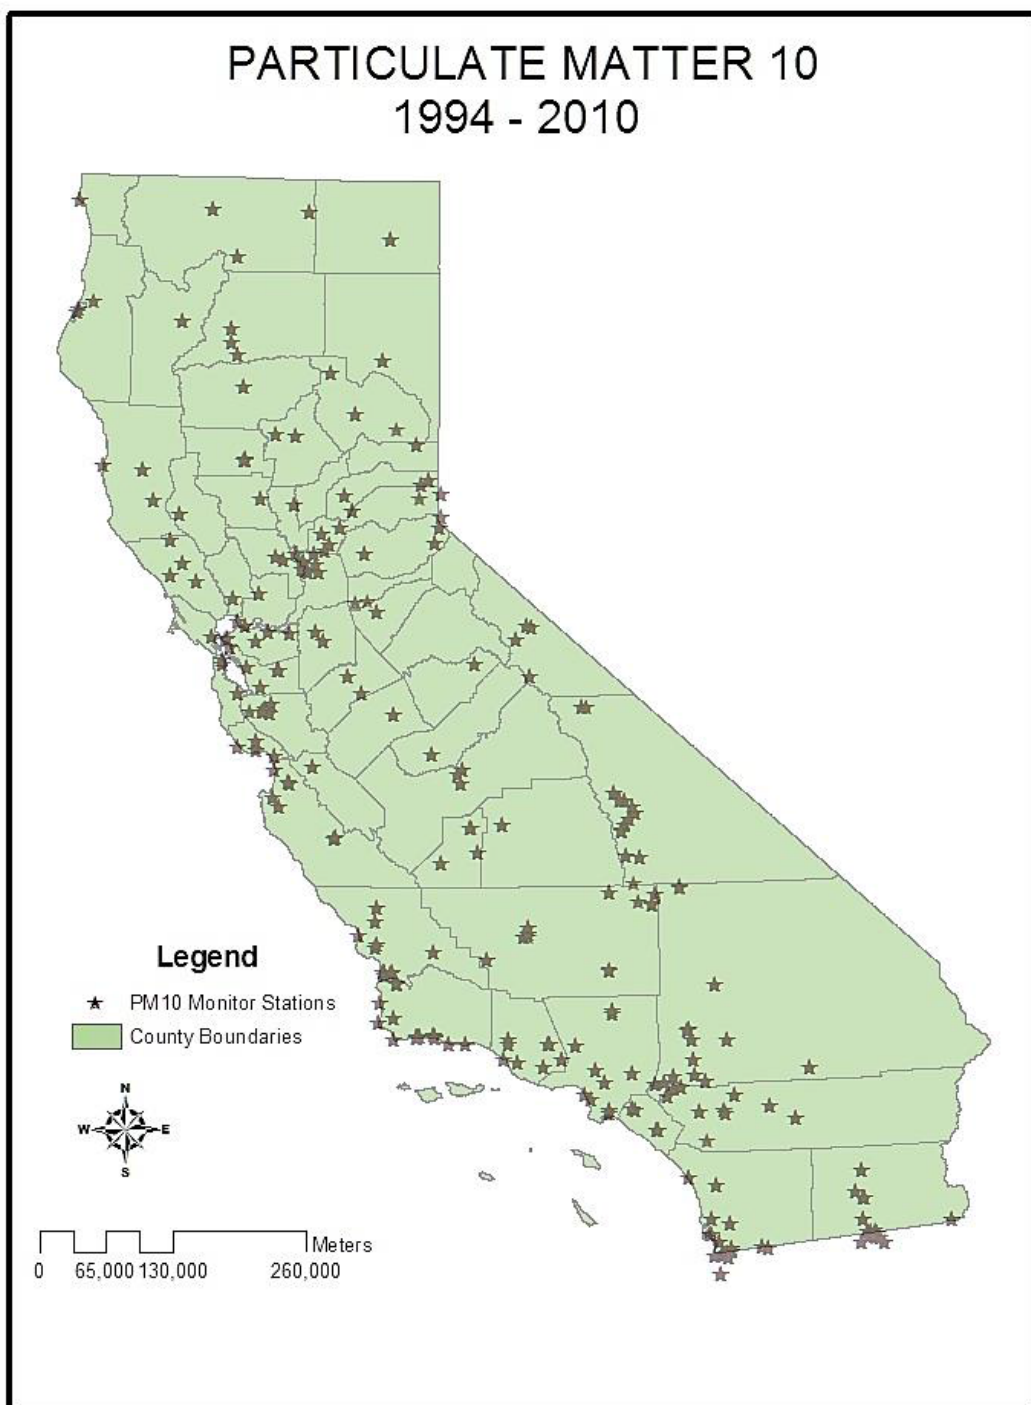

Figure S3. Available SO<sub>2</sub> pollutant monitors in California

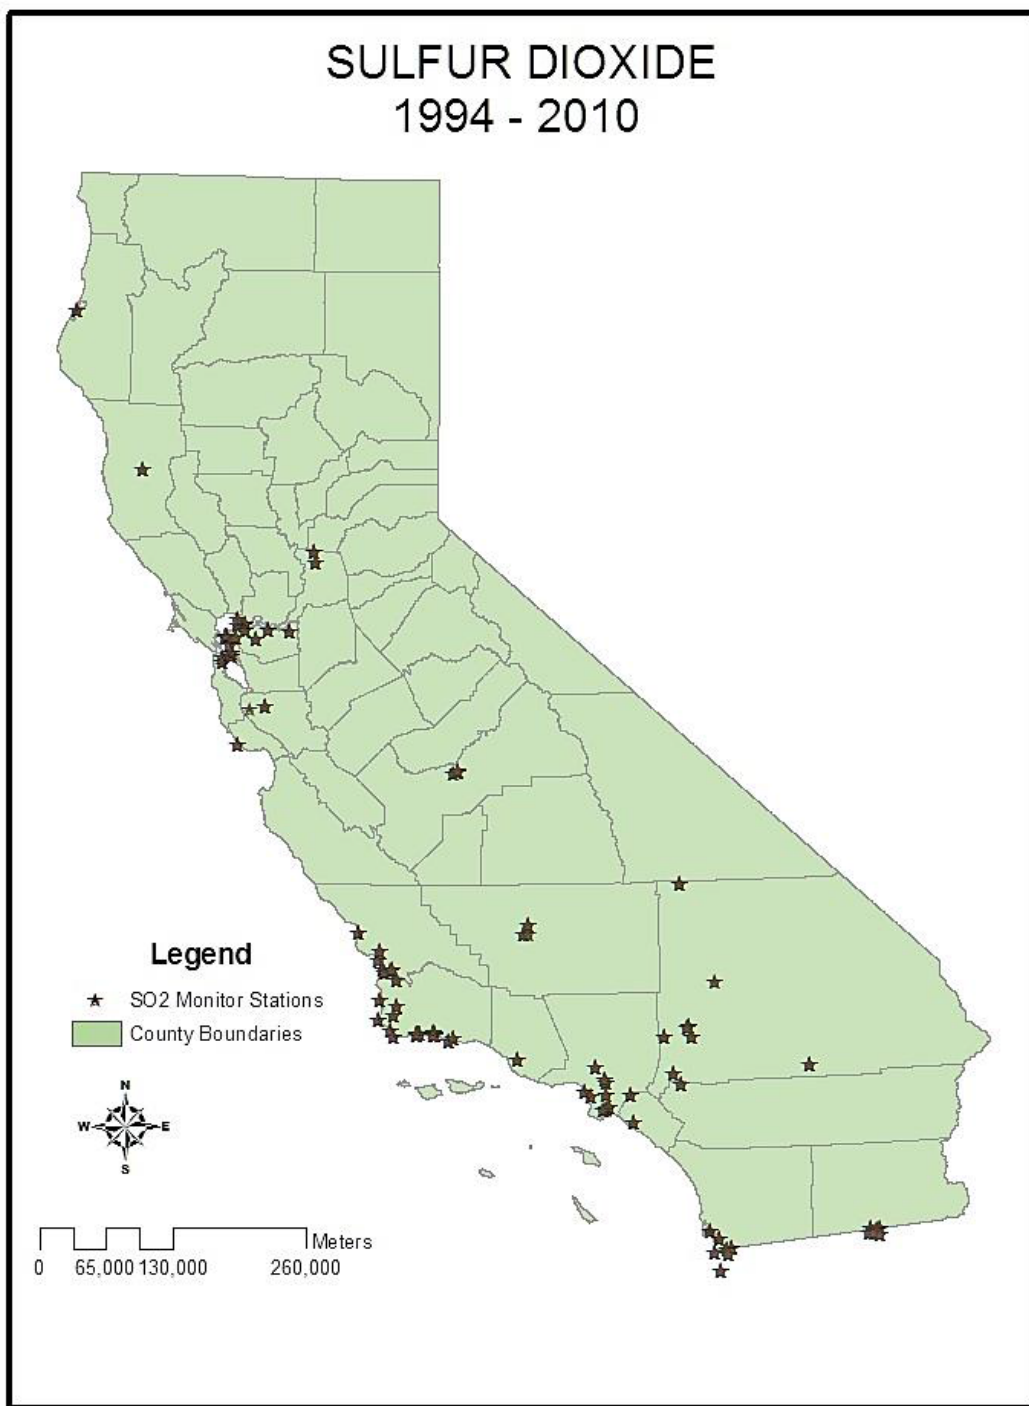

Figure S4. Available NO<sub>2</sub> pollutant monitors in California

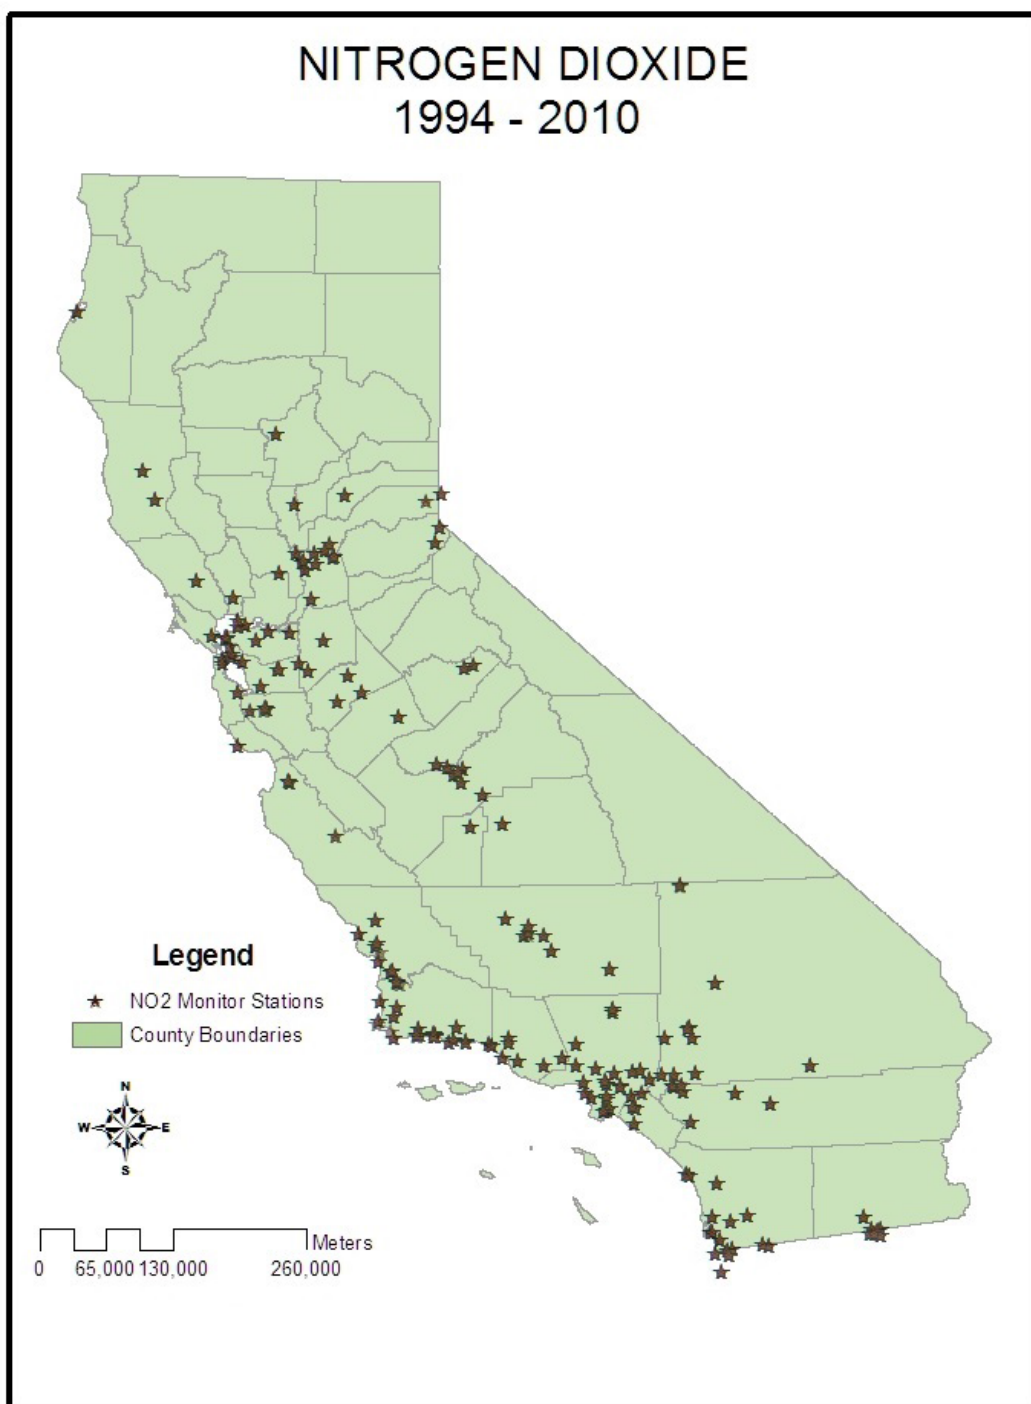

Figure S5. Available O<sub>3</sub> pollutant monitors in California

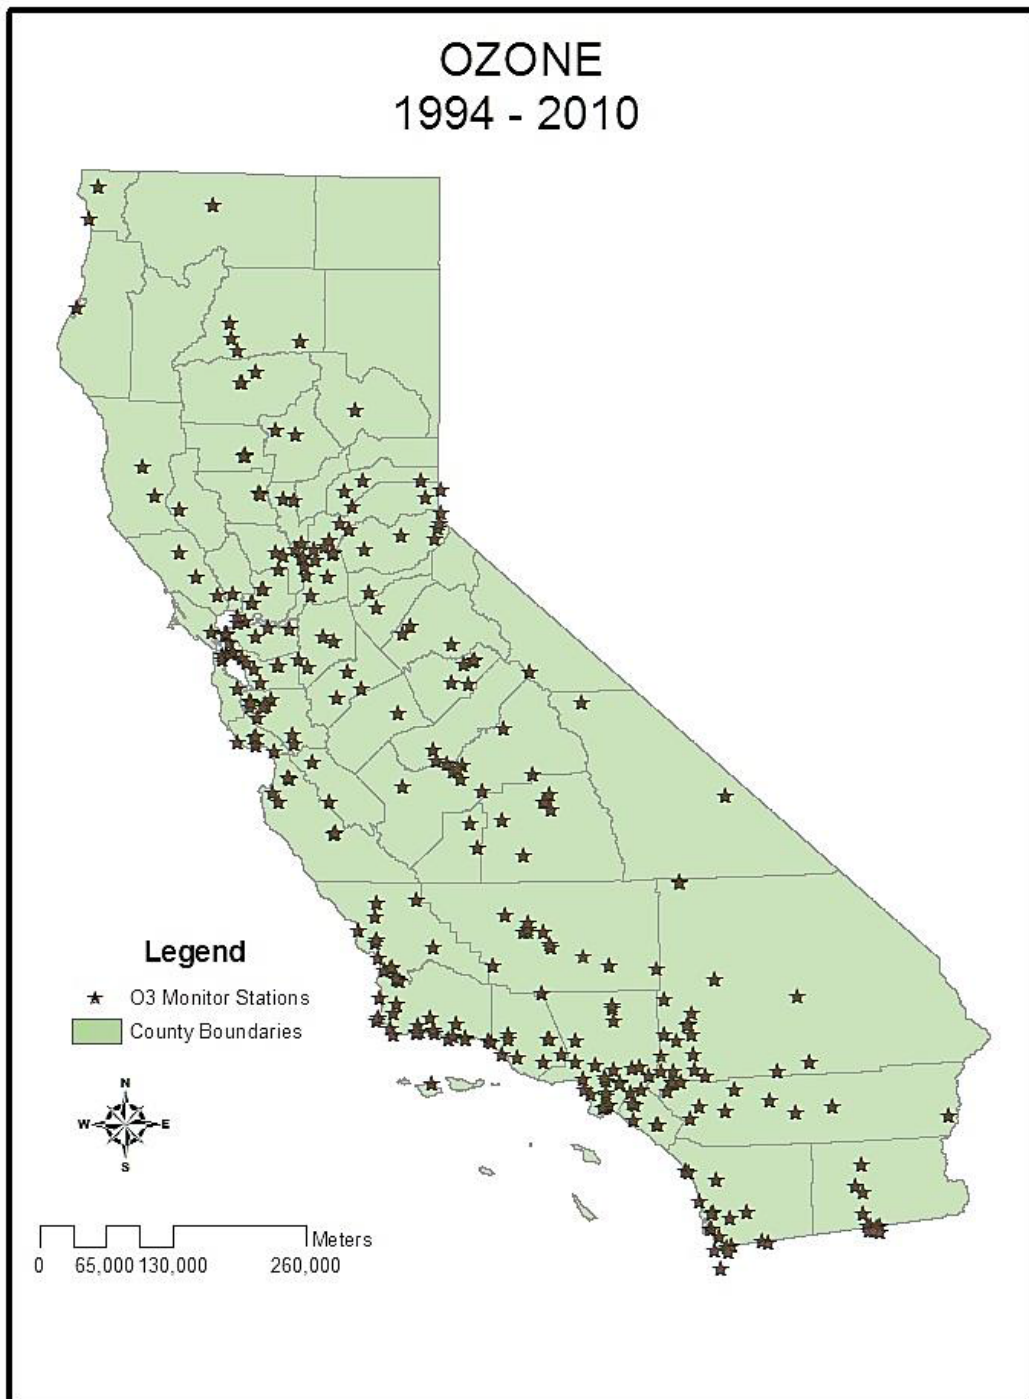

Figure S6. Available CO pollutant monitors in California

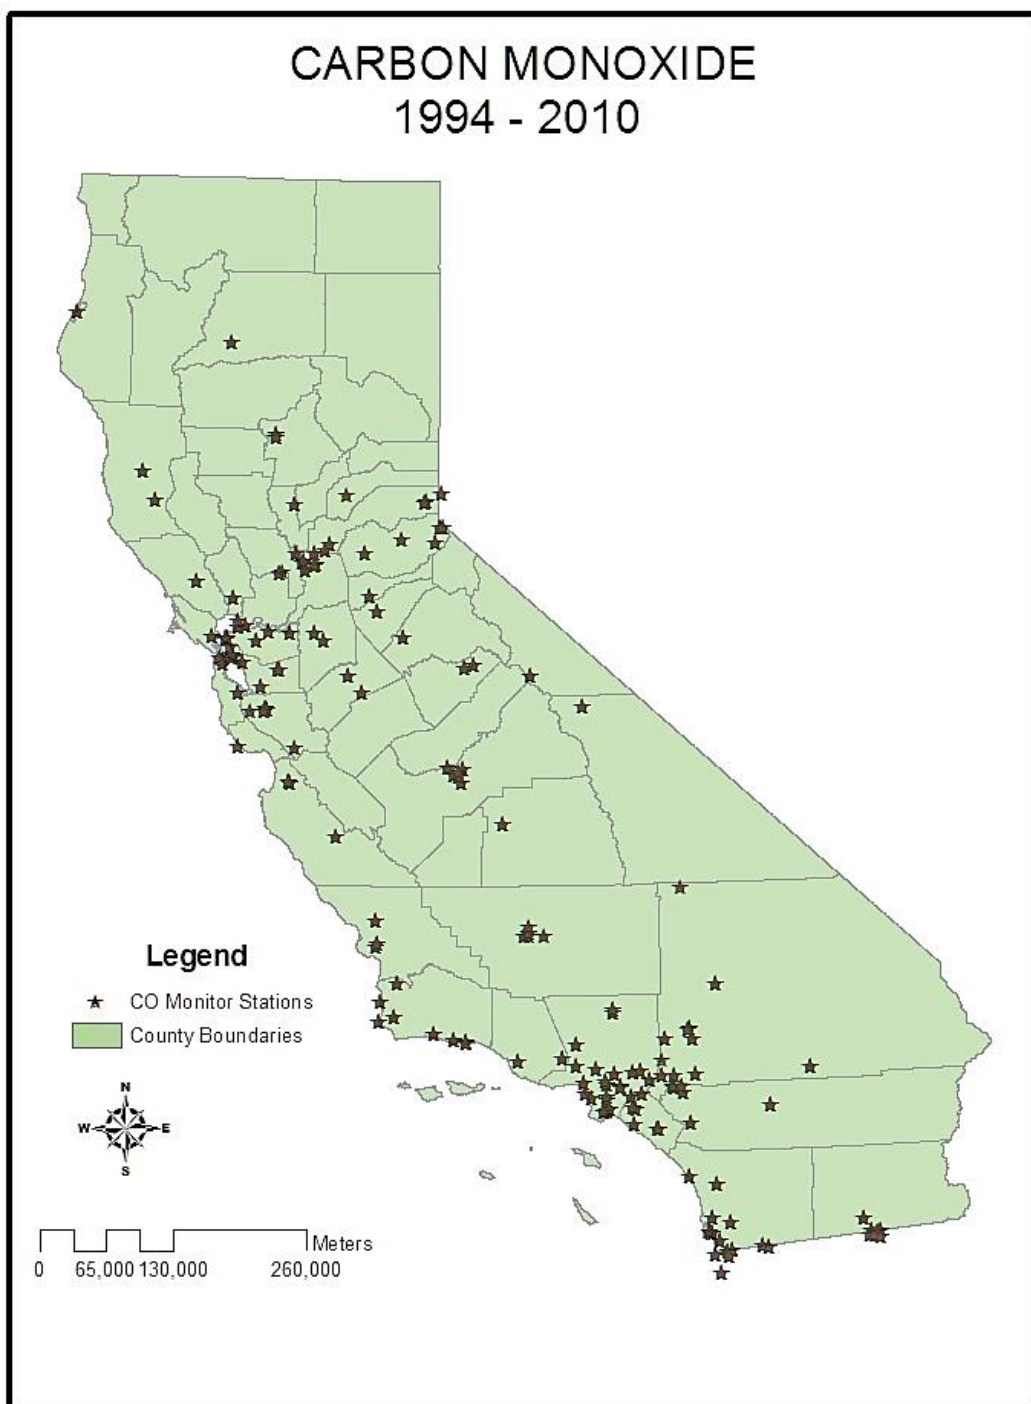

Supplement: ehp.1408166.s001.acco.pdf [file ehp.1408166.s001.acco.pdf]
